# Supplementary material for: Cavefish cope with environmental hypoxia by developing more erythrocytes and overexpression of hypoxia-inducible genes
Source: eLife. 2022 Jan 5;11:e69109. doi: 10.7554/eLife.69109 (PMC8765751; doi:10.7554/eLife.69109)
Supplement: Figure 1—source data 1. [file elife-69109-fig1-data1.xlsx]

## Sheet: Fig. 1F
Figure 1F source data
	Blood Cell Number
larvae	Surface fish	Cavefish
1	238	258
2	228	252
3	210	251
4	190	240
5	184	236
6	171	232
7	168	216
8	164	214
9	162	209
10	157	209
11	150	204
12	148	197
13	146	193
14	141	191
15	141	190
16	134	187
17	134	186
18	130	185
19	130	178
20	128	178
21	128	178
22	123	178
23	121	174
24	119	173
25	118	171
26	118	170
27	117	169
28	116	168
29	115	168
30	113	164
31	112	163
32	109	161
33	109	161
34	107	161
35	107	159
36	106	156
37	106	155
38	105	153
39	100	151
40	100	148
41	99	143
42	97	142
43	95	142
44	95	141
45	94	137
46	92	134
47	91	131
48	91	127
49	90	127
50	87	126
51	85	124
52	85	121
53	84	119
54	80	115
55	77	114
56	77	113
57	76	113
58	76	107
59	75	103
60	74	100
61	74	94
62	70	91
63	69	84
64	66	79
65	66	79
66	65	73
67	64	64
68	62	58
69	60	57
70	60	12
71	58	10
72	45	0

## Sheet: Fig. 1I & 1J
Figure 1 I and J source data
Morph	time point	sample	gene	delta delta Ct	fold change/sample	fold change/timepoint	range(negative)	range(positive)
Surfac fish	10h	n1	gfi1aa	-2.46	5.50217	1	0.718595	2.5536
Surfac fish	10h	n2	gfi1aa	1.92333	0.263645
Surfac fish	10h	n3	gfi1aa	0.536667	0.689362
Surfac fish	24h	n1	gfi1aa	-5.02333	32.5218	39.7624	6.11641	7.2283
Surfac fish	24h	n2	gfi1aa	-5.30333	39.4878
Surfac fish	24h	n3	gfi1aa	-5.61333	48.9533
Surfac fish	60h	n1	gfi1aa	-2.18333	4.54202	4.17951	0.239801	0.254397
Surfac fish	60h	n2	gfi1aa	-2.01333	4.03714
Surfac fish	60h	n3	gfi1aa	-1.99333	3.98156
Cavefish	10h	n1	gfi1aa	-2.11667	4.33691	0.78398	0.574439	2.14921
Cavefish	10h	n2	gfi1aa	2.51667	0.174746
Cavefish	10h	n3	gfi1aa	0.653333	0.63581
Cavefish	24h	n1	gfi1aa	-6.35333	81.7606	70.5219	13.3077	16.4031
Cavefish	24h	n2	gfi1aa	-5.71333	52.4668
Cavefish	24h	n3	gfi1aa	-6.35333	81.7606
Cavefish	60h	n1	gfi1aa	-1.73333	3.32495	4.39745	0.807967	0.989834
Cavefish	60h	n2	gfi1aa	-2.25667	4.77886
Cavefish	60h	n3	gfi1aa	-2.42	5.35171
Surfac fish	10h	n1	hbbe2	-1.53333	2.88786	1	0.618623	1.62208
Surfac fish	10h	n2	hbbe2	1.83333	0.281265
Surfac fish	10h	n3	hbbe2	-0.3	1.23114
Surfac fish	24h	n1	hbbe2	-6.08667	67.9625	36.3082	13.115	20.5311
Surfac fish	24h	n2	hbbe2	-4.61333	24.4766
Surfac fish	24h	n3	hbbe2	-4.84667	28.7735
Surfac fish	60h	n1	hbbe2	-7.86667	233.401	230.188	23.9479	26.7287
Surfac fish	60h	n2	hbbe2	-7.64333	199.928
Surfac fish	60h	n3	hbbe2	-8.03	261.379
Cavefish	10h	n1	hbbe2	-3.24333	9.4698	5.55325	2.30738	3.94761
Cavefish	10h	n2	hbbe2	-2.76333	6.78963
Cavefish	10h	n3	hbbe2	-1.41333	2.66352
Cavefish	24h	n1	hbbe2	-6.38667	83.6716	73.5733	31.0438	53.7036
Cavefish	24h	n2	hbbe2	-5.15333	35.5884
Cavefish	24h	n3	hbbe2	-7.06333	133.744
Cavefish	60h	n1	hbbe2	-8.54667	373.941	377.995	3.57215	3.60623
Cavefish	60h	n2	hbbe2	-8.56	377.413
Cavefish	60h	n3	hbbe2	-8.58	382.681
