# Supplementary material for: Cavefish cope with environmental hypoxia by developing more erythrocytes and overexpression of hypoxia-inducible genes
Source: eLife. 2022 Jan 5;11:e69109. doi: 10.7554/eLife.69109 (PMC8765751; doi:10.7554/eLife.69109)
Supplement: Figure 2—source data 1. [file elife-69109-fig2-data1.xlsx]

## Sheet: Fig 2 A,B and C
Figure 2 A, B and C source data
Morph	time point	sample	gene	delta delta Ct	fold change/sample	fold change/timepoint	range(negative)	range(positive)
Surfac fish	24h	n1	gfi1aa	-5.02333	32.5218	39.7624	6.11641	7.2283
Surfac fish	24h	n2	gfi1aa	-5.30333	39.4878
Surfac fish	24h	n3	gfi1aa	-5.61333	48.9533
Surfac fish	60h	n1	gfi1aa	-2.18333	4.54202	4.17951	0.239801	0.254397
Surfac fish	60h	n2	gfi1aa	-2.01333	4.03714
Surfac fish	60h	n3	gfi1aa	-1.99333	3.98156
Cavefish	24h	n1	gfi1aa	-6.35333	81.7606	70.5219	13.3077	16.4031
Cavefish	24h	n2	gfi1aa	-5.71333	52.4668
Cavefish	24h	n3	gfi1aa	-6.35333	81.7606
Cavefish	60h	n1	gfi1aa	-1.73333	3.32495	4.39745	0.807967	0.989834
Cavefish	60h	n2	gfi1aa	-2.25667	4.77886
Cavefish	60h	n3	gfi1aa	-2.42	5.35171
Surfac fish	24h	n1	hbbe2	-6.08667	67.9625	77.44	44.01	101.93
Surfac fish	24h	n2	hbbe2	-4.61333	24.4766
Surfac fish	24h	n3	hbbe2	-4.84667	28.7735
Surfac fish	24h	n4	hbbe2	-7.42	171.65
Surfac fish	24h	n5	hbbe2	-6.9	119.43
Surfac fish	24h	n6	hbbe2	-7.78	219.79
Surfac fish	60h	n1	hbbe2	-7.86667	233.401	246.78	35.13	40.96
Surfac fish	60h	n2	hbbe2	-7.64333	199.928
Surfac fish	60h	n3	hbbe2	-8.03	261.379
Surfac fish	60h	n4	hbbe2	-8.25	304.09
Cavefish	24h	n1	hbbe2	-6.38667	83.6716	72.91	31.36	55.01
Cavefish	24h	n2	hbbe2	-5.15333	35.5884
Cavefish	24h	n3	hbbe2	-7.06333	133.744
Cavefish	24h	n4	hbbe2	-5.13	35.02
Cavefish	24h	n5	hbbe2	-5.88	58.76
Cavefish	24h	n6	hbbe2	-6.29	78.43
Cavefish	24h	n7	hbbe2	-7.41	170.47
Cavefish	60h	n1	hbbe2	-8.54667	373.941	444.95	109.53	145.3
Cavefish	60h	n2	hbbe2	-8.56	377.413
Cavefish	60h	n3	hbbe2	-8.58	382.681
Cavefish	60h	n4	hbbe2	-9.5	725.75
Surfac fish	24h	n1	hbb2	-6.73	105.969	74.9	36.88	72.63
Surfac fish	24h	n2	hbb2	-6.04	65.99
Surfac fish	24h	n3	hbb2	-4.07	16.766
Surfac fish	24h	n4	hbb2	-6.1	68.475
Surfac fish	24h	n5	hbb2	-5.62	49.208
Surfac fish	24h	n6	hbb2	-6.76	113.117
Surfac fish	24h	n7	hbb2	-7.14	147.203
Surfac fish	24h	n8	hbb2	-7.17	150.644
Cavefish	24h	n1	hbb2	-7.45	174.954	150.601	30.543	38.313
Cavefish	24h	n2	hbb2	-6.91	120.328
Cavefish	24h	n3	hbb2	-7.49	179.458
Cavefish	24h	n4	hbb2	-6.88	117.58
Cavefish	24h	n5	hbb2	-7.2	147.03
Cavefish	24h	n6	hbb2	-6.78	109.9
Cavefish	24h	n7	hbb2	-7.41	170.47
Cavefish	24h	n8	hbb2	-7.76	216.27
Surfac fish	60h	n1	hbb2	-9.09417	546.534	474.002	85.776	104.727
Surfac fish	60h	n2	hbb2	-9.2875	624.908
Surfac fish	60h	n3	hbb2	-8.96417	499.44
Surfac fish	60h	n4	hbb2	-9.06083	534.051
Surfac fish	60h	n5	hbb2	-9.0575	532.818
Surfac fish	60h	n6	hbb2	-8.50083	362.248
Surfac fish	60h	n7	hbb2	-8.7275	423.876
Surfac fish	60h	n8	hbb2	-8.4175	341.916
Cavefish	60h	n1	hbb2	-9.18	581.714	648.442	77.999	88.664
Cavefish	60h	n2	hbb2	-9.78	877.649
Cavefish	60h	n3	hbb2	-9.39	669.76
Cavefish	60h	n4	hbb2	-9.26	612.048
Cavefish	60h	n5	hbb2	-9.36	659.015
Cavefish	60h	n6	hbb2	-9.16	573.706
Cavefish	60h	n7	hbb2	-9.21	593.937
Cavefish	60h	n8	hbb2	-9.38	665.133

## Sheet: test Ct value reference genes
Test of Ct values reference genes at progressing hours post fertilization
morph	gene	hpf	Ct
SF	rpl13a	10	16.7
SF	rpl13a	24	14.7
SF	rpl13a	60	14.7
CF	rpl13a	10	16.7
CF	rpl13a	24	15.2
CF	rpl13a	60	15.4
SF	lsm12a	10	23.6
SF	lsm12a	24	21.9
SF	lsm12a	60	24.2
CF	lsm12a	10	22.6
CF	lsm12a	24	20.8
CF	lsm12a	60	28
SF	acta1b	10	20.3
SF	acta1b	24	15.5
SF	acta1b	60	14
CF	acta1b	10	20.5
CF	acta1b	24	16.7
CF	acta1b	60	19.2
