# Supplementary material for: Cavefish cope with environmental hypoxia by developing more erythrocytes and overexpression of hypoxia-inducible genes
Source: eLife. 2022 Jan 5;11:e69109. doi: 10.7554/eLife.69109 (PMC8765751; doi:10.7554/eLife.69109)
Supplement: Figure 4—source data 1. [file elife-69109-fig4-data1.xlsx]

## Sheet: Fig. 4B
Figure 4B source data
	Blood Cell Number (% of control)
	Surface fish		Cavefish
larvae	1 mg PHZ/L	2 mg PHZ/L	1 mg PHZ/L	2 mg PHZ/L
1	0	15.7729	67.0103	115.979
2	6.30915	0	0	121.134
3	30.4942	0	38.6598	229.381
4	0	0	54.1237	59.2784
5	25.2366	24.1851	7.73196	97.9381
6	16.8244	0	64.433	146.907
7	0	0	82.4742	0
8	0	0	121.134	23.1959
9	18.9274	0	79.8969	103.093
10	6.30915	0	193.299	0

## Sheet: Fig. 4D
Figure 4D source data
	Surface fish tail length (mm)				Cavefish tail length (mm)
larvae	0 mg/L PHZ	0.5 mg/L PHZ	1 mg/L PHZ	2 mg/L PHZ	0 mg/L PHZ	0.5 mg/L PHZ	1 mg/L PHZ	2 mg/L PHZ	4 mg/L PHZ
1	2.1261	2.07661	1.93859	1.71154	2.25572	2.02837	1.88215	1.92749	2.0153
2	2.12561	1.85201	1.83434	1.66662	2.23603	2.00608	1.81743	1.86208	1.8428
3	2.09417	1.75157	1.81459	1.56977	2.22824	1.98953	1.8139	1.85621	1.79914
4	2.06357	1.68366	1.74506	1.5599	2.20978	1.89281	1.80052	1.81626	1.77703
5	2.03123	1.65643	1.67167	1.533	2.19681	1.87661	1.78614	1.76921	1.76029
6	2.01734	1.62108	1.60046	1.50866	2.15414	1.78737	1.78463	1.74357	1.71052
7	1.97982	1.57821	1.5615	1.47645	2.14494	1.76	1.76003	1.71677	1.6902
8	1.97681	1.57697	1.55875	1.42381	2.13717	1.75403	1.73234	1.69365	1.51838
9	1.95192	1.57635	1.54749	1.41537	2.12512	1.7262	1.70215	1.68567	1.46483
10	1.91141	1.56563	1.49248	1.40399	2.09164	1.72486	1.65516	1.67794	1.46235
