# Supplementary material for: Cavefish cope with environmental hypoxia by developing more erythrocytes and overexpression of hypoxia-inducible genes
Source: eLife. 2022 Jan 5;11:e69109. doi: 10.7554/eLife.69109 (PMC8765751; doi:10.7554/eLife.69109)
Supplement: Figure 5—source data 1. [file elife-69109-fig5-data1.xlsx]

## Sheet: Fig. 5B
Figure 5B source data
	Relative growth (10 e-2)
	Surface fish		Cavefish
Sample	Normoxic	Hypoxic	Normoxic	Hypoxic
1	5.87295	5.80928	4.44468	5.38738
2	5.5136	4.94958	4.17915	4.50033
3	5.10615	4.20541	3.98811	3.46537
4	4.93934	2.08135	2.83435	2.77628
5	4.099	0.495001	2.40295	2.71169
6	3.10953	0.10183	1.71969	2.6427

## Sheet: Fig. 5C
Figure 5C source data
Morph	Treatment	Sample	gene	delta delta Ct	fold change/sample	fold change/treatment	range(negative)	range(positive)
SF	Normoxic	n1	IGFBP1a	0.330556	0.79523	1	0.148088	0.17383
SF	Normoxic	n2	IGFBP1a	0.153889	0.898824
SF	Normoxic	n3	IGFBP1a	0.0805556	0.945693
SF	Normoxic	n4	IGFBP1a	-0.0694444	1.04931
SF	Normoxic	n5	IGFBP1a	-0.236111	1.17781
SF	Normoxic	n6	IGFBP1a	-0.259444	1.19702
SF	Hypoxic	n1	IGFBP1a	-0.222778	1.16698	2.37475	1.24142	2.60123
SF	Hypoxic	n2	IGFBP1a	-0.266111	1.20256
SF	Hypoxic	n3	IGFBP1a	-0.372778	1.29484
SF	Hypoxic	n4	IGFBP1a	-1.92611	3.80029
SF	Hypoxic	n5	IGFBP1a	-2.23278	4.70038
SF	Hypoxic	n6	IGFBP1a	-2.46611	5.52552
CF	Normoxic	n1	IGFBP1a	-0.0594444	1.04206	1.67791	0.498099	0.70839
CF	Normoxic	n2	IGFBP1a	-0.462778	1.37819
CF	Normoxic	n3	IGFBP1a	-0.476111	1.39099
CF	Normoxic	n4	IGFBP1a	-0.956111	1.94007
CF	Normoxic	n5	IGFBP1a	-1.05278	2.07452
CF	Normoxic	n6	IGFBP1a	-1.47278	2.77556
CF	Hypoxic	n1	IGFBP1a	-0.152778	1.11171	1.64528	0.587701	0.914288
CF	Hypoxic	n2	IGFBP1a	-0.259444	1.19702
CF	Hypoxic	n3	IGFBP1a	-0.406111	1.32511
CF	Hypoxic	n4	IGFBP1a	-0.549444	1.46352
CF	Hypoxic	n5	IGFBP1a	-1.12278	2.17766
CF	Hypoxic	n6	IGFBP1a	-1.81944	3.52945
SF	Normoxic	n1	Hif1aa	0.734444	0.601049	1	0.357398	0.556173
SF	Normoxic	n2	Hif1aa	0.561111	0.67778
SF	Normoxic	n3	Hif1aa	0.307778	0.807885
SF	Normoxic	n4	Hif1aa	-0.218889	1.16384
SF	Normoxic	n5	Hif1aa	-0.492222	1.40661
SF	Normoxic	n6	Hif1aa	-0.892222	1.85603
SF	Hypoxic	n1	Hif1aa	0.677778	0.625127	0.920897	0.278161	0.398542
SF	Hypoxic	n2	Hif1aa	0.541111	0.687241
SF	Hypoxic	n3	Hif1aa	0.511111	0.701682
SF	Hypoxic	n4	Hif1aa	-0.222222	1.16653
SF	Hypoxic	n5	Hif1aa	-0.235556	1.17736
SF	Hypoxic	n6	Hif1aa	-0.558889	1.47313
CF	Normoxic	n1	Hif1aa	0.487778	0.713123	1.45062	0.540694	0.861985
CF	Normoxic	n2	Hif1aa	0.0444444	0.969663
CF	Normoxic	n3	Hif1aa	-0.532222	1.44616
CF	Normoxic	n4	Hif1aa	-1.01222	2.01702
CF	Normoxic	n5	Hif1aa	-1.04556	2.06416
CF	Normoxic	n6	Hif1aa	-1.16222	2.23802
CF	Hypoxic	n1	Hif1aa	-0.0955556	1.06848	1.35817	0.185028	0.214211
CF	Hypoxic	n2	Hif1aa	-0.385556	1.30636
CF	Hypoxic	n3	Hif1aa	-0.402222	1.32154
CF	Hypoxic	n4	Hif1aa	-0.488889	1.40336
CF	Hypoxic	n5	Hif1aa	-0.542222	1.45621
CF	Hypoxic	n6	Hif1aa	-0.735556	1.66504
SF	Normoxic	n1	Hif1ab	0.443056	0.735575	1	0.196911	0.245193
SF	Normoxic	n2	Hif1ab	0.119722	0.920365
SF	Normoxic	n3	Hif1ab	0.106389	0.92891
SF	Normoxic	n4	Hif1ab	-0.0336111	1.02357
SF	Normoxic	n5	Hif1ab	-0.123611	1.08946
SF	Normoxic	n6	Hif1ab	-0.511944	1.42597
SF	Hypoxic	n1	Hif1ab	0.619722	0.650796	1.1331	0.313072	0.432596
SF	Hypoxic	n2	Hif1ab	0.0930556	0.937535
SF	Hypoxic	n3	Hif1ab	-0.256944	1.19495
SF	Hypoxic	n4	Hif1ab	-0.373611	1.29559
SF	Hypoxic	n5	Hif1ab	-0.520278	1.43423
SF	Hypoxic	n6	Hif1ab	-0.643611	1.56223
CF	Normoxic	n1	Hif1ab	-0.0602778	1.04267	1.48367	0.256478	0.310081
CF	Normoxic	n2	Hif1ab	-0.510278	1.42432
CF	Normoxic	n3	Hif1ab	-0.563611	1.47796
CF	Normoxic	n4	Hif1ab	-0.736944	1.66664
CF	Normoxic	n5	Hif1ab	-0.740278	1.6705
CF	Normoxic	n6	Hif1ab	-0.803611	1.74546
CF	Hypoxic	n1	Hif1ab	-0.0102778	1.00715	1.32027	0.257667	0.320147
CF	Hypoxic	n2	Hif1ab	-0.0936111	1.06704
CF	Hypoxic	n3	Hif1ab	-0.303611	1.23423
CF	Hypoxic	n4	Hif1ab	-0.560278	1.47455
CF	Hypoxic	n5	Hif1ab	-0.660278	1.58039
CF	Hypoxic	n6	Hif1ab	-0.776944	1.7135
SF	Normoxic	n1	Hif1a-like	0.152222	0.899863	1	0.100383	0.111584
SF	Normoxic	n2	Hif1a-like	0.0755556	0.948977
SF	Normoxic	n3	Hif1a-like	0.0755556	0.948977
SF	Normoxic	n4	Hif1a-like	0.0588889	0.960003
SF	Normoxic	n5	Hif1a-like	-0.101111	1.0726
SF	Normoxic	n6	Hif1a-like	-0.261111	1.1984
SF	Hypoxic	n1	Hif1a-like	0.332222	0.794312	1.08673	0.284807	0.385957
SF	Hypoxic	n2	Hif1a-like	0.298889	0.812878
SF	Hypoxic	n3	Hif1a-like	0.155556	0.897787
SF	Hypoxic	n4	Hif1a-like	-0.347778	1.2726
SF	Hypoxic	n5	Hif1a-like	-0.454444	1.37026
SF	Hypoxic	n6	Hif1a-like	-0.704444	1.62952
CF	Normoxic	n1	Hif1a-like	-0.0111111	1.00773	1.45846	0.350823	0.461939
CF	Normoxic	n2	Hif1a-like	-0.217778	1.16294
CF	Normoxic	n3	Hif1a-like	-0.361111	1.28441
CF	Normoxic	n4	Hif1a-like	-0.881111	1.84179
CF	Normoxic	n5	Hif1a-like	-0.891111	1.8546
CF	Normoxic	n6	Hif1a-like	-0.904444	1.87182
CF	Hypoxic	n1	Hif1a-like	-0.0144444	1.01006	1.24545	0.225671	0.275611
CF	Hypoxic	n2	Hif1a-like	-0.107778	1.07757
CF	Hypoxic	n3	Hif1a-like	-0.144444	1.1053
CF	Hypoxic	n4	Hif1a-like	-0.364444	1.28739
CF	Hypoxic	n5	Hif1a-like	-0.481111	1.39582
CF	Hypoxic	n6	Hif1a-like	-0.787778	1.72641
SF	Normoxic	n1	Hif1a-like2	0.352222	0.783377	1	0.196271	0.2442
SF	Normoxic	n2	Hif1a-like2	0.182222	0.881344
SF	Normoxic	n3	Hif1a-like2	0.112222	0.925162
SF	Normoxic	n4	Hif1a-like2	0.0222222	0.984715
SF	Normoxic	n5	Hif1a-like2	-0.107778	1.07757
SF	Normoxic	n6	Hif1a-like2	-0.561111	1.47541
SF	Hypoxic	n1	Hif1a-like2	0.148889	0.901945	1.15669	0.165245	0.192786
SF	Hypoxic	n2	Hif1a-like2	-0.104444	1.07508
SF	Hypoxic	n3	Hif1a-like2	-0.127778	1.09261
SF	Hypoxic	n4	Hif1a-like2	-0.367778	1.29036
SF	Hypoxic	n5	Hif1a-like2	-0.397778	1.31748
SF	Hypoxic	n6	Hif1a-like2	-0.411111	1.32971
CF	Normoxic	n1	Hif1a-like2	-0.507778	1.42186	1.88049	0.257773	0.298721
CF	Normoxic	n2	Hif1a-like2	-0.847778	1.79973
CF	Normoxic	n3	Hif1a-like2	-0.994444	1.99231
CF	Normoxic	n4	Hif1a-like2	-1.01444	2.02012
CF	Normoxic	n5	Hif1a-like2	-1.01444	2.02012
CF	Normoxic	n6	Hif1a-like2	-1.08778	2.12546
CF	Hypoxic	n1	Hif1a-like2	-0.157778	1.11557	1.59598	0.345882	0.441582
CF	Hypoxic	n2	Hif1a-like2	-0.377778	1.29934
CF	Hypoxic	n3	Hif1a-like2	-0.617778	1.53451
CF	Hypoxic	n4	Hif1a-like2	-0.881111	1.84179
CF	Hypoxic	n5	Hif1a-like2	-1.00111	2.00154
CF	Hypoxic	n6	Hif1a-like2	-1.01111	2.01546
SF	Normoxic	n1	HK1	0.443889	0.73515	1	0.195889	0.243609
SF	Normoxic	n2	HK1	0.167222	0.890556
SF	Normoxic	n3	HK1	0.163889	0.892616
SF	Normoxic	n4	HK1	-0.122778	1.08883
SF	Normoxic	n5	HK1	-0.239444	1.18054
SF	Normoxic	n6	HK1	-0.412778	1.33125
SF	Hypoxic	n1	HK1	0.537222	0.689096	0.918771	0.205212	0.264228
SF	Hypoxic	n2	HK1	0.383889	0.766369
SF	Hypoxic	n3	HK1	0.277222	0.825178
SF	Hypoxic	n4	HK1	0.0838889	0.943511
SF	Hypoxic	n5	HK1	-0.0694444	1.04931
SF	Hypoxic	n6	HK1	-0.479444	1.39421
CF	Normoxic	n1	HK1	0.153889	0.898824	1.29834	0.309927	0.407108
CF	Normoxic	n2	HK1	0.00722222	0.995006
CF	Normoxic	n3	HK1	-0.332778	1.25944
CF	Normoxic	n4	HK1	-0.579444	1.49427
CF	Normoxic	n5	HK1	-0.662778	1.58313
CF	Normoxic	n6	HK1	-0.846111	1.79765
CF	Hypoxic	n1	HK1	0.183889	0.880327	1.15136	0.185163	0.220648
CF	Hypoxic	n2	HK1	-0.0761111	1.05417
CF	Hypoxic	n3	HK1	-0.169444	1.12463
CF	Hypoxic	n4	HK1	-0.229444	1.17238
CF	Hypoxic	n5	HK1	-0.376111	1.29784
CF	Hypoxic	n6	HK1	-0.552778	1.46691
SF	Normoxic	n1	G6PD	0.252222	0.839602	1	0.156359	0.185339
SF	Normoxic	n2	G6PD	0.155556	0.897787
SF	Normoxic	n3	G6PD	0.0822222	0.944602
SF	Normoxic	n4	G6PD	0.0722222	0.951172
SF	Normoxic	n5	G6PD	-0.134444	1.09767
SF	Normoxic	n6	G6PD	-0.427778	1.34516
SF	Hypoxic	n1	G6PD	0.435556	0.739409	1.23732	0.335558	0.460423
SF	Hypoxic	n2	G6PD	-0.0144444	1.01006
SF	Hypoxic	n3	G6PD	-0.357778	1.28145
SF	Hypoxic	n4	G6PD	-0.407778	1.32664
SF	Hypoxic	n5	G6PD	-0.737778	1.66761
SF	Hypoxic	n6	G6PD	-0.761111	1.6948
CF	Normoxic	n1	G6PD	-0.0444444	1.03129	1.44894	0.34871	0.459231
CF	Normoxic	n2	G6PD	-0.174444	1.12853
CF	Normoxic	n3	G6PD	-0.387778	1.30838
CF	Normoxic	n4	G6PD	-0.661111	1.5813
CF	Normoxic	n5	G6PD	-0.961111	1.94681
CF	Normoxic	n6	G6PD	-0.981111	1.97399
CF	Hypoxic	n1	G6PD	-0.0394444	1.02772	1.41476	0.351798	0.468229
CF	Hypoxic	n2	G6PD	-0.0977778	1.07012
CF	Hypoxic	n3	G6PD	-0.344444	1.26966
CF	Hypoxic	n4	G6PD	-0.699444	1.62388
CF	Hypoxic	n5	G6PD	-0.717778	1.64465
CF	Hypoxic	n6	G6PD	-1.10444	2.15016
SF	Normoxic	n1	LDHa	0.247778	0.842193	1	0.185353	0.227525
SF	Normoxic	n2	LDHa	0.241111	0.846093
SF	Normoxic	n3	LDHa	0.111111	0.925875
SF	Normoxic	n4	LDHa	0.0877778	0.940971
SF	Normoxic	n5	LDHa	-0.168889	1.12419
SF	Normoxic	n6	LDHa	-0.518889	1.43285
SF	Hypoxic	n1	LDHa	0.407778	0.753784	0.947151	0.132165	0.153598
SF	Hypoxic	n2	LDHa	0.144444	0.904728
SF	Hypoxic	n3	LDHa	0.0811111	0.945329
SF	Hypoxic	n4	LDHa	0.0644444	0.956314
SF	Hypoxic	n5	LDHa	0.0411111	0.971906
SF	Hypoxic	n6	LDHa	-0.268889	1.20488
CF	Normoxic	n1	LDHa	0.257778	0.836375	1.11557	0.257228	0.334314
CF	Normoxic	n2	LDHa	0.207778	0.86587
CF	Normoxic	n3	LDHa	0.0311111	0.978666
CF	Normoxic	n4	LDHa	-0.282222	1.21607
CF	Normoxic	n5	LDHa	-0.575556	1.49025
CF	Normoxic	n6	LDHa	-0.585556	1.50062
CF	Hypoxic	n1	LDHa	0.481111	0.716426	0.962409	0.203015	0.257289
CF	Hypoxic	n2	LDHa	0.316111	0.803232
CF	Hypoxic	n3	LDHa	0.0711111	0.951905
CF	Hypoxic	n4	LDHa	-0.00888889	1.00618
CF	Hypoxic	n5	LDHa	-0.0122222	1.00851
CF	Hypoxic	n6	LDHa	-0.515556	1.42954
SF	Normoxic	n1	PDK1	0.231111	0.851978	1	0.109558	0.123038
SF	Normoxic	n2	PDK1	0.0744444	0.949708
SF	Normoxic	n3	PDK1	0.0577778	0.960743
SF	Normoxic	n4	PDK1	0.0111111	0.992328
SF	Normoxic	n5	PDK1	-0.125556	1.09093
SF	Normoxic	n6	PDK1	-0.248889	1.18829
SF	Hypoxic	n1	PDK1	0.557778	0.679348	0.888843	0.206292	0.26864
SF	Hypoxic	n2	PDK1	0.447778	0.733171
SF	Hypoxic	n3	PDK1	0.401111	0.757275
SF	Hypoxic	n4	PDK1	0.207778	0.86587
SF	Hypoxic	n5	PDK1	-0.238889	1.18008
SF	Hypoxic	n6	PDK1	-0.355556	1.27948
CF	Normoxic	n1	PDK1	0.511111	0.701682	1.07301	0.29366	0.404311
CF	Normoxic	n2	PDK1	0.347778	0.785794
CF	Normoxic	n3	PDK1	-0.00222222	1.00154
CF	Normoxic	n4	PDK1	-0.412222	1.33073
CF	Normoxic	n5	PDK1	-0.432222	1.34931
CF	Normoxic	n6	PDK1	-0.622222	1.53924
CF	Hypoxic	n1	PDK1	-0.0255556	1.01787	1.19472	0.101607	0.111051
CF	Hypoxic	n2	PDK1	-0.215556	1.16115
CF	Hypoxic	n3	PDK1	-0.285556	1.21888
CF	Hypoxic	n4	PDK1	-0.285556	1.21888
CF	Hypoxic	n5	PDK1	-0.328889	1.25605
CF	Hypoxic	n6	PDK1	-0.398889	1.31849
