# Supplementary material for: Cavefish cope with environmental hypoxia by developing more erythrocytes and overexpression of hypoxia-inducible genes
Source: eLife. 2022 Jan 5;11:e69109. doi: 10.7554/eLife.69109 (PMC8765751; doi:10.7554/eLife.69109)
Supplement: Figure 6—source data 1. [file elife-69109-fig6-data1.xlsx]

## Sheet: Fig. 6B
Figure 6B source data
	Growth (mm)						Red blood cell number
	Surface fish		Cavefish				Surface fish		Cavefish
Larvae	Normoxic	Hypoxic	Normoxic	Hypoxic		Larvae	Normoxic	Hypoxic	Normoxic	Hypoxic
1	0.330134	0.27165	0.262185	0.190568		1	153	64	129	172
2	0.287608	0.294693	0.146266	0.291657		2	146	93	112	168
3	0.272065	0.249765	0.148842	0.250265		3	103		166	126
4	0.253478	0.229717	0.304211	0.292231		4	108	92	212	128
5	0.312326	0.256672	0.196887	0.354524		5	155	153	147	186
6	0.28637	0.195483	0.246601	0.23155		6	136	119	125	133
7	0.243416	0.182434	0.194341	0.252369		7	139	119	84	128
8	0.34297	0.286116	0.24273	0.225703		8	93	119	124	86
9	0.302017	0.248314	0.215556	0.265428		9	129	60	132	190
10	0.325891	0.170555	0.188983	0.334443		10	110	98	50	141
11	0.359179	0.212545	0.18651	0.317613		11	134	82	172	95
12	0.313282	0.229788	0.203395	0.253708		12	108	76	14	150
13	0.262341	0.211701	0.224017	0.25491		13	175	109	113	145
14	0.255363	0.266723	0.326771	0.224255		14	106	82	141	113
15	0.268486	0.255448	0.222801	0.266986		15	135	88	164	158
16	0.322683	0.269505	0.129471	0.284034		16	106	119	151	96
17	0.317121	0.247156	0.155082	0.285045		17	109	35	185	154
18	0.308517	0.177478	0.286556	0.30111		18	84	70	110	109
19	0.289786	0.230304	0.201379	0.294881		19	61	83	144	187
20	0.350519	0.255836	0.240686	0.286247		20	23	106	179	143
21	0.330432	0.262347	0.288715	0.214802		21	106	99	148	160
22	0.34106	0.223165	0.246238	0.175267		22	136	54	138	139
23	0.291113	0.259877	0.268669	0.246659		23			125	130
24			0.200004	0.246139		24			159	138
25			0.133313	0.331459		25			125	145
26			0.290993	0.300028		26			184	150
27			0.286876	0.272532		27			129	164
28			0.265948	0.214712		28			71	101
29			0.189658	0.221657		29			152	115
30			0.319828	0.262573		30			152	141
31			0.288441	0.264347		31			150	165
32			0.200974	0.187584		32			150	146
33			0.283455	0.347445		33			62	148
34			0.236998	0.288269		34			159	162
35			0.234104	0.230091		35			201	140
36			0.223405	0.300796		36			180	176
37			0.266592	0.229654		37			122	153
38			0.146525	0.302769		38			117	106
39			0.293897	0.303799		39			165	158
40			0.364138	0.308963		40			156	94
41			0.195384	0.293969		41			118	153
42			0.166153	0.267385		42			169	129
43			0.180393	0.276546		43			137	154
44			0.228973	0.289786		44			147	132
45			0.168503	0.268253		45			147	130
46			0.101652	0.280955		46			142
47				0.295403		47			138

## Sheet: Fig. 6C
Figure 6C source data
	Diameter (mm)
	Surface fish		Cavefish
Larvae	Normoxic	Hypoxic	Normoxic	Hypoxic
1	0.274423	0.248648	0.208593	0.209205
2	0.244219	0.237885	0.179628	0.204339
3	0.248631	0.220555	0.217937	0.197874
4	0.280943	0.207762	0.208579	0.193339
5	0.252347	0.226109	0.19171	0.210049
6	0.243716	0.210232	0.196284	0.222063
7	0.259648	0.239803	0.179257	0.175186
8	0.251801	0.181454	0.225	0.225022
9	0.246467	0.241268	0.188825	0.202205
10	0.182109	0.202115	0.224331	0.218096
11	0.192306	0.217243	0.214847	0.199046
12	0.228686	0.204393	0.197366	0.195221
13	0.23535	0.206402	0.214891	0.188391
14	0.241877	0.21762	0.203363	0.189093
15	0.255844		0.202798	0.189333
16	0.286615		0.218847	0.207669
17	0.220913		0.220404	0.195432
18	0.248		0.203776	0.201265
19			0.186219	0.176374
20			0.210866	0.208639
21			0.224363	0.175852
22			0.201276	0.199303
23			0.218604	0.223191
24			0.22259	0.214303
25			0.219962	0.191828
26			0.210399	0.195475
27			0.206434	0.186762
28			0.215749	0.205287
29			0.196284
30			0.168631
