# Supplementary material for: Cavefish cope with environmental hypoxia by developing more erythrocytes and overexpression of hypoxia-inducible genes
Source: eLife. 2022 Jan 5;11:e69109. doi: 10.7554/eLife.69109 (PMC8765751; doi:10.7554/eLife.69109)
Supplement: Figure 7—source data 1. [file elife-69109-fig7-data1.xlsx]

## Sheet: Fig. 7
Figure 7 source data
Morph	Treatment	Sample	gene	delta delta Ct	fold change/sample	fold change/treatment	range(negative)	range(positive)
SF	Normoxic	n1	igfbp1a	0.495	0.709562	1	0.212572	0.269957
SF	Normoxic	n2	igfbp1a	0.268333	0.830278
SF	Normoxic	n3	igfbp1a	-0.0916667	1.0656
SF	Normoxic	n4	igfbp1a	-0.0316667	1.02219
SF	Normoxic	n5	igfbp1a	-0.621667	1.53865
SF	Normoxic	n6	igfbp1a	-0.0183333	1.01279
SF	Hypoxic	n1	igfbp1a	-0.915	1.88557	2.25445	0.415781	0.509802
SF	Hypoxic	n2	igfbp1a	-1.075	2.10672
SF	Hypoxic	n3	igfbp1a	-1.635	3.10588
SF	Hypoxic	n4	igfbp1a	-0.945	1.92519
SF	Hypoxic	n5	igfbp1a	-0.941667	1.92075
SF	Hypoxic	n6	igfbp1a	-1.525	2.87787
CF	Normoxic	n1	igfbp1a	-0.851667	1.80458	1.50351	0.24949	0.299127
CF	Normoxic	n2	igfbp1a	-0.755	1.68763
CF	Normoxic	n3	igfbp1a	-0.905	1.87254
CF	Normoxic	n4	igfbp1a	-0.285	1.21841
CF	Normoxic	n5	igfbp1a	-0.475	1.38992
CF	Normoxic	n6	igfbp1a	-0.258333	1.1961
CF	Hypoxic	n1	igfbp1a	-1.65167	3.14196	3.29373	0.520339	0.617964
CF	Hypoxic	n2	igfbp1a	-1.78167	3.43823
CF	Hypoxic	n3	igfbp1a	-1.975	3.93128
CF	Hypoxic	n4	igfbp1a	-1.325	2.50533
CF	Hypoxic	n5	igfbp1a	-1.53833	2.90459
CF	Hypoxic	n6	igfbp1a	-2.04667	4.1315
SF	Normoxic	n1	hif1aa	-0.331667	1.25847	1	0.181803	0.2222
SF	Normoxic	n2	hif1aa	-0.148333	1.10829
SF	Normoxic	n3	hif1aa	-0.0583333	1.04126
SF	Normoxic	n4	hif1aa	0.588333	0.665111
SF	Normoxic	n5	hif1aa	-0.125	1.09051
SF	Normoxic	n6	hif1aa	0.075	0.949342
SF	Hypoxic	n1	hif1aa	-0.161667	1.11858	1.25266	0.321565	0.432621
SF	Hypoxic	n2	hif1aa	-0.918333	1.88993
SF	Hypoxic	n3	hif1aa	-0.641667	1.56013
SF	Hypoxic	n4	hif1aa	-0.608333	1.5245
SF	Hypoxic	n5	hif1aa	0.121667	0.919125
SF	Hypoxic	n6	hif1aa	0.258333	0.836053
CF	Normoxic	n1	hif1aa	-0.135	1.09809	1.24377	0.0910195	0.0982062
CF	Normoxic	n2	hif1aa	-0.498333	1.41258
CF	Normoxic	n3	hif1aa	-0.248333	1.18783
CF	Normoxic	n4	hif1aa	-0.335	1.26138
CF	Normoxic	n5	hif1aa	-0.35	1.27456
CF	Normoxic	n6	hif1aa	-0.321667	1.24977
CF	Hypoxic	n1	hif1aa	-0.881667	1.8425	1.49284	0.194585	0.22375
CF	Hypoxic	n2	hif1aa	-0.575	1.48968
CF	Hypoxic	n3	hif1aa	-0.371667	1.29385
CF	Hypoxic	n4	hif1aa	-0.695	1.61888
CF	Hypoxic	n5	hif1aa	-0.281667	1.2156
CF	Hypoxic	n6	hif1aa	-0.663333	1.58374
SF	Normoxic	n1	hif1ab	0.0366667	0.974905	1	0.182366	0.22304
SF	Normoxic	n2	hif1ab	0.256667	0.83702
SF	Normoxic	n3	hif1ab	0.393333	0.761368
SF	Normoxic	n4	hif1ab	-0.266667	1.20303
SF	Normoxic	n5	hif1ab	-0.46	1.37554
SF	Normoxic	n6	hif1ab	0.04	0.972655
SF	Hypoxic	n1	hif1ab	-0.226667	1.17013	1.20767	0.184328	0.217529
SF	Hypoxic	n2	hif1ab	-0.68	1.60214
SF	Hypoxic	n3	hif1ab	-0.126667	1.09177
SF	Hypoxic	n4	hif1ab	-0.47	1.38511
SF	Hypoxic	n5	hif1ab	-0.183333	1.1355
SF	Hypoxic	n6	hif1ab	0.0533333	0.963707
CF	Normoxic	n1	hif1ab	-0.143333	1.10445	1.18783	0.118226	0.131294
CF	Normoxic	n2	hif1ab	-0.153333	1.11214
CF	Normoxic	n3	hif1ab	-0.13	1.09429
CF	Normoxic	n4	hif1ab	-0.526667	1.4406
CF	Normoxic	n5	hif1ab	-0.156667	1.11471
CF	Normoxic	n6	hif1ab	-0.38	1.30134
CF	Hypoxic	n1	hif1ab	-0.453333	1.3692	1.20372	0.170621	0.198799
CF	Hypoxic	n2	hif1ab	-0.34	1.26576
CF	Hypoxic	n3	hif1ab	0.08	0.946058
CF	Hypoxic	n4	hif1ab	-0.59	1.50525
CF	Hypoxic	n5	hif1ab	-0.15	1.10957
CF	Hypoxic	n6	hif1ab	-0.151667	1.11085
SF	Normoxic	n1	hif1a-like	-0.0283333	1.01983	1	0.226563	0.29293
SF	Normoxic	n2	hif1a-like	-0.168333	1.12376
SF	Normoxic	n3	hif1a-like	0.478333	0.717806
SF	Normoxic	n4	hif1a-like	-0.135	1.09809
SF	Normoxic	n5	hif1a-like	-0.591667	1.50699
SF	Normoxic	n6	hif1a-like	0.445	0.734584
SF	Hypoxic	n1	hif1a-like	-0.421667	1.33947	1.36236	0.111218	0.121104
SF	Hypoxic	n2	hif1a-like	-0.498333	1.41258
SF	Hypoxic	n3	hif1a-like	-0.255	1.19334
SF	Hypoxic	n4	hif1a-like	-0.655	1.57462
SF	Hypoxic	n5	hif1a-like	-0.478333	1.39313
SF	Hypoxic	n6	hif1a-like	-0.368333	1.29086
CF	Normoxic	n1	hif1a-like	-0.175	1.12896	1.40824	0.244322	0.295609
CF	Normoxic	n2	hif1a-like	-0.285	1.21841
CF	Normoxic	n3	hif1a-like	-0.235	1.17691
CF	Normoxic	n4	hif1a-like	-0.908333	1.87688
CF	Normoxic	n5	hif1a-like	-0.675	1.5966
CF	Normoxic	n6	hif1a-like	-0.685	1.6077
CF	Hypoxic	n1	hif1a-like	-0.155	1.11342	1.38644	0.210194	0.247756
CF	Hypoxic	n2	hif1a-like	-0.418333	1.33638
CF	Hypoxic	n3	hif1a-like	-0.261667	1.19886
CF	Hypoxic	n4	hif1a-like	-0.538333	1.45229
CF	Hypoxic	n5	hif1a-like	-0.561667	1.47597
CF	Hypoxic	n6	hif1a-like	-0.893333	1.85746
SF	Normoxic	n1	hif1a-like2	0.0355556	0.975656	1	0.40806	0.689361
SF	Normoxic	n2	hif1a-like2	0.0655556	0.955577
SF	Normoxic	n3	hif1a-like2	0.865556	0.548835
SF	Normoxic	n4	hif1a-like2	-0.691111	1.61453
SF	Normoxic	n5	hif1a-like2	-1.17778	2.26228
SF	Normoxic	n6	hif1a-like2	0.902222	0.535062
SF	Hypoxic	n1	hif1a-like2	-0.731111	1.65992	1.81294	0.502005	0.694241
SF	Hypoxic	n2	hif1a-like2	-0.861111	1.81644
SF	Hypoxic	n3	hif1a-like2	-1.19778	2.29386
SF	Hypoxic	n4	hif1a-like2	-1.36444	2.57477
SF	Hypoxic	n5	hif1a-like2	-1.07444	2.10591
SF	Hypoxic	n6	hif1a-like2	0.0788889	0.946787
CF	Normoxic	n1	hif1a-like2	-0.864444	1.82064	2.06575	0.671487	0.994879
CF	Normoxic	n2	hif1a-like2	-0.874444	1.8333
CF	Normoxic	n3	hif1a-like2	-0.0244444	1.01709
CF	Normoxic	n4	hif1a-like2	-1.83778	3.57459
CF	Normoxic	n5	hif1a-like2	-1.45111	2.73419
CF	Normoxic	n6	hif1a-like2	-1.22778	2.34206
CF	Hypoxic	n1	hif1a-like2	-1.19444	2.28857	2.37613	0.293755	0.335194
CF	Hypoxic	n2	hif1a-like2	-0.934444	1.91115
CF	Hypoxic	n3	hif1a-like2	-1.14444	2.21061
CF	Hypoxic	n4	hif1a-like2	-1.27778	2.42465
CF	Hypoxic	n5	hif1a-like2	-1.52444	2.87676
CF	Hypoxic	n6	hif1a-like2	-1.41611	2.66865
SF	Normoxic	n1	hk1	-0.216667	1.16205	1	0.155831	0.184597
SF	Normoxic	n2	hk1	0.436667	0.73884
SF	Normoxic	n3	hk1	-0.31	1.23971
SF	Normoxic	n4	hk1	0.01	0.993092
SF	Normoxic	n5	hk1	-0.0633333	1.04488
SF	Normoxic	n6	hk1	0.143333	0.905425
SF	Hypoxic	n1	hk1	-0.76	1.69349	1.55713	0.2952	0.364256
SF	Hypoxic	n2	hk1	-1.09	2.12874
SF	Hypoxic	n3	hk1	-0.853333	1.80667
SF	Hypoxic	n4	hk1	-0.58	1.49485
SF	Hypoxic	n5	hk1	-0.373333	1.29534
SF	Hypoxic	n6	hk1	-0.176667	1.13027
CF	Normoxic	n1	hk1	0.14	0.907519	0.97041	0.0560892	0.05953
CF	Normoxic	n2	hk1	-0.0666667	1.04729
CF	Normoxic	n3	hk1	0.0733333	0.950439
CF	Normoxic	n4	hk1	-0.05	1.03526
CF	Normoxic	n5	hk1	0.01	0.993092
CF	Normoxic	n6	hk1	0.153333	0.899171
CF	Hypoxic	n1	hk1	-0.693333	1.61702	1.48767	0.185353	0.211734
CF	Hypoxic	n2	hk1	-0.51	1.42405
CF	Hypoxic	n3	hk1	-0.733333	1.66248
CF	Hypoxic	n4	hk1	-0.773333	1.70921
CF	Hypoxic	n5	hk1	-0.206667	1.15402
CF	Hypoxic	n6	hk1	-0.521667	1.43561
SF	Normoxic	n1	g6pd	0.0388889	0.973404	1	0.148858	0.174892
SF	Normoxic	n2	g6pd	0.365556	0.77617
SF	Normoxic	n3	g6pd	0.00555556	0.996157
SF	Normoxic	n4	g6pd	-0.167778	1.12333
SF	Normoxic	n5	g6pd	-0.377778	1.29934
SF	Normoxic	n6	g6pd	0.135556	0.910319
SF	Hypoxic	n1	g6pd	-0.157778	1.11557	1.04086	0.134465	0.154413
SF	Hypoxic	n2	g6pd	0.175556	0.885426
SF	Hypoxic	n3	g6pd	-0.211111	1.15758
SF	Hypoxic	n4	g6pd	-0.194444	1.14428
SF	Hypoxic	n5	g6pd	-0.224444	1.16833
SF	Hypoxic	n6	g6pd	0.265556	0.831878
CF	Normoxic	n1	g6pd	0.402222	0.756692	0.939523	0.221205	0.289325
CF	Normoxic	n2	g6pd	0.152222	0.899863
CF	Normoxic	n3	g6pd	0.632222	0.645182
CF	Normoxic	n4	g6pd	-0.601111	1.51688
CF	Normoxic	n5	g6pd	0.00555556	0.996157
CF	Normoxic	n6	g6pd	-0.0511111	1.03606
CF	Hypoxic	n1	g6pd	0.342222	0.788825	0.867372	0.172126	0.214741
CF	Hypoxic	n2	g6pd	0.538889	0.688301
CF	Hypoxic	n3	g6pd	0.588889	0.664855
CF	Hypoxic	n4	g6pd	0.155556	0.897787
CF	Hypoxic	n5	g6pd	-0.134444	1.09767
CF	Hypoxic	n6	g6pd	-0.259444	1.19702
SF	Normoxic	n1	ldha	0.412778	0.751176	1	0.31806	0.466404
SF	Normoxic	n2	ldha	0.0794444	0.946422
SF	Normoxic	n3	ldha	0.352778	0.783075
SF	Normoxic	n4	ldha	-0.460556	1.37607
SF	Normoxic	n5	ldha	-0.980556	1.97323
SF	Normoxic	n6	ldha	0.596111	0.661535
SF	Hypoxic	n1	ldha	0.176111	0.885086	1.0056	0.388429	0.632896
SF	Hypoxic	n2	ldha	0.909444	0.53239
SF	Hypoxic	n3	ldha	0.722778	0.60593
SF	Hypoxic	n4	ldha	-0.843889	1.79488
SF	Hypoxic	n5	ldha	-0.937222	1.91484
SF	Hypoxic	n6	ldha	-0.0755556	1.05377
CF	Normoxic	n1	ldha	-0.0605556	1.04287	0.935191	0.184294	0.229525
CF	Normoxic	n2	ldha	0.296111	0.814445
CF	Normoxic	n3	ldha	-0.147222	1.10744
CF	Normoxic	n4	ldha	-0.390556	1.3109
CF	Normoxic	n5	ldha	0.479444	0.717254
CF	Normoxic	n6	ldha	0.402778	0.756401
CF	Hypoxic	n1	ldha	0.466111	0.723913	0.911722	0.159407	0.193184
CF	Hypoxic	n2	ldha	0.569444	0.673876
CF	Hypoxic	n3	ldha	-0.107222	1.07715
CF	Hypoxic	n4	ldha	-0.0872222	1.06232
CF	Hypoxic	n5	ldha	0.0361111	0.97528
CF	Hypoxic	n6	ldha	-0.0772222	1.05498
SF	Normoxic	n1	pdk1	0.455556	0.729229	1	0.376393	0.603575
SF	Normoxic	n2	pdk1	0.368889	0.774379
SF	Normoxic	n3	pdk1	0.602222	0.658739
SF	Normoxic	n4	pdk1	-0.597778	1.51338
SF	Normoxic	n5	pdk1	-1.24444	2.36927
SF	Normoxic	n6	pdk1	0.415556	0.749731
SF	Hypoxic	n1	pdk1	0.332222	0.794312	1.08402	0.326457	0.467139
SF	Hypoxic	n2	pdk1	0.515556	0.699524
SF	Hypoxic	n3	pdk1	-0.291111	1.22358
SF	Hypoxic	n4	pdk1	-0.741111	1.67146
SF	Hypoxic	n5	pdk1	-0.777778	1.71449
SF	Hypoxic	n6	pdk1	0.263889	0.83284
CF	Normoxic	n1	pdk1	0.382222	0.767255	1.11922	0.214073	0.264703
CF	Normoxic	n2	pdk1	0.0455556	0.968917
CF	Normoxic	n3	pdk1	-0.281111	1.21513
CF	Normoxic	n4	pdk1	-0.427778	1.34516
CF	Normoxic	n5	pdk1	-0.159444	1.11686
CF	Normoxic	n6	pdk1	-0.534444	1.44838
CF	Hypoxic	n1	pdk1	0.132222	0.912425	0.980364	0.228313	0.297626
CF	Hypoxic	n2	pdk1	0.625556	0.64817
CF	Hypoxic	n3	pdk1	0.0688889	0.953372
CF	Hypoxic	n4	pdk1	-0.664444	1.58496
CF	Hypoxic	n5	pdk1	0.122222	0.918771
CF	Hypoxic	n6	pdk1	-0.112778	1.08131

## Sheet: test Ct value reference genes
Ct value reference genes SF normoxic. cDNA 1 ng/µl					Ct value reference genes SF normoxic compared to a selection of genes tested at 1,5,10 ng/µl							test of Ct values reference genes with Ct value closest to genes tested
gene	Ct				gene	10 ng/µl	5 ng/µl	1 ng/µl				Morph	Treatment	Sample	gene	Ct
gnb1b	24.9				hif1a	25.1833	26.0633	28.36				SF	Normoxic	n1	gnb1b	19.5733
erp44	26.2				hif1a-like	19.37	20.27	22.63				SF	Normoxic	n2	gnb1b	19.98
acta1b	18.1				hk1	21.2133	22.505	24.5733				SF	Normoxic	n3	gnb1b	20.7867
rpl13a	19.1				ldha	19.3533	20.2767	22.6				SF	Normoxic	n4	gnb1b	20.2533
					pdk1	24.6767	25.61	27.98				SF	Normoxic	n5	gnb1b	20.4567
					rpl13a	15.4533	16.4067	18.7633				SF	Normoxic	n6	gnb1b	19.71
					gnb1b	20.2033	21.1567	23.43				SF	Hypoxic	n1	gnb1b	20.4167
					erp44	20.6533	21.6133	23.98				SF	Hypoxic	n2	gnb1b	20.6767
												SF	Hypoxic	n3	gnb1b	21.6
												SF	Hypoxic	n4	gnb1b	19.9467
												SF	Hypoxic	n5	gnb1b	18.9433
												SF	Hypoxic	n6	gnb1b	20.7133
												CF	Normoxic	n1	gnb1b	19.6767
												CF	Normoxic	n2	gnb1b	20.1033
												CF	Normoxic	n3	gnb1b	21.43
												CF	Normoxic	n4	gnb1b	20.07
												CF	Normoxic	n5	gnb1b	19.9933
												CF	Normoxic	n6	gnb1b	20.6133
												CF	Hypoxic	n1	gnb1b	19.63
												CF	Hypoxic	n2	gnb1b	19.9333
												CF	Hypoxic	n3	gnb1b	20.9433
												CF	Hypoxic	n4	gnb1b	20.92
												CF	Hypoxic	n5	gnb1b	20.3
												CF	Hypoxic	n6	gnb1b	20.2833
												SF	Normoxic	n1	erp44	20.06
												SF	Normoxic	n2	erp44	20.21
												SF	Normoxic	n3	erp44	20.8767
												SF	Normoxic	n4	erp44	20.93
												SF	Normoxic	n5	erp44	21.1067
												SF	Normoxic	n6	erp44	20.3233
												SF	Hypoxic	n1	erp44	20.615
												SF	Hypoxic	n2	erp44	20.5167
												SF	Hypoxic	n3	erp44	21.6733
												SF	Hypoxic	n4	erp44	20.6433
												SF	Hypoxic	n5	erp44	19.7133
												SF	Hypoxic	n6	erp44	21.48
												CF	Normoxic	n1	erp44	19.23
												CF	Normoxic	n2	erp44	19.75
												CF	Normoxic	n3	erp44	21.3967
												CF	Normoxic	n4	erp44	19.76
												CF	Normoxic	n5	erp44	20.5867
												CF	Normoxic	n6	erp44	21.2967
												CF	Hypoxic	n1	erp44	19.4933
												CF	Hypoxic	n2	erp44	19.8733
												CF	Hypoxic	n3	erp44	21.03
												CF	Hypoxic	n4	erp44	20.7
												CF	Hypoxic	n5	erp44	20.54
												CF	Hypoxic	n6	erp44	20.7133
