# Supplementary material for: Cavefish cope with environmental hypoxia by developing more erythrocytes and overexpression of hypoxia-inducible genes
Source: eLife. 2022 Jan 5;11:e69109. doi: 10.7554/eLife.69109 (PMC8765751; doi:10.7554/eLife.69109)
Supplement: Table 1—source data 1. [file elife-69109-table1-data1.xlsx]

## Sheet: Sheet1
Morph	Treatment	Notochord Defect	Edemas
SF	control	0 (24)	0 (24)
SF	1 mg/L	21 (24)	1 (24)
SF	2 mg/L	24/ (24)	18 (24)
SF	3 mg/L	24 (24)	23 (24)
CF	control	0 (12)	0 (24)
CF	1 mg/L	10 (24)	0 (24)
CF	2 mg/L	21 (24)	2 (24)
CF	3 mg/L	24 (24)	6 (24)
